# Supplementary material for: Elucidating the Structural Impacts of Protein InDels
Source: MDPI journal article supplement (doi:10.3390/biom12101435), 2022-10-07
Supplement: s1 [file s1]

# Elucidating the Structural Impacts of Protein InDels – Supplementary Material

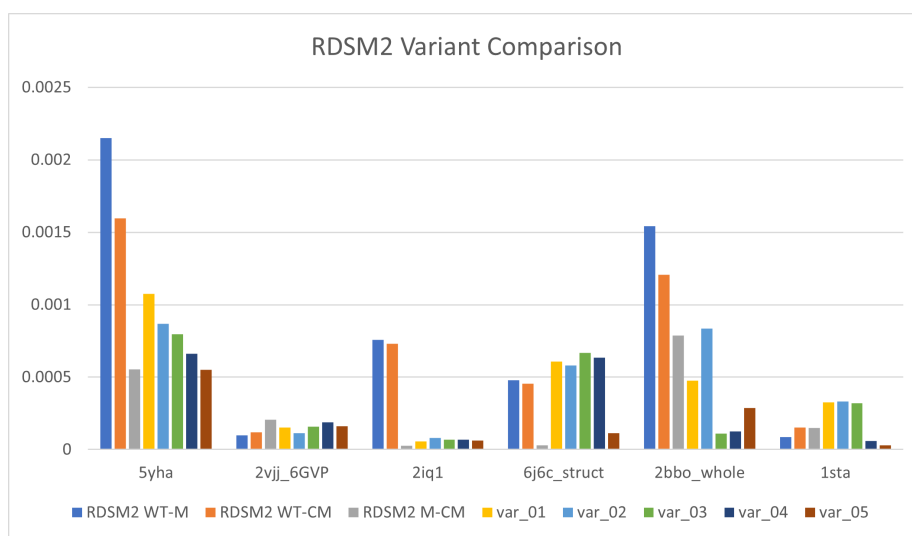

Figure S1: Comparison of the RDSM2 scores of both our original method, and 5 additional computationally generated mutants compared with our computationally generated mutant.

Table S1: RDSM2, RDSM3, and TLCCS between each of the computationally generated variants and their associated computationally generated mutant.

| Variant           | RDSM2    | RDSM3    | TLCCS |
|-------------------|----------|----------|-------|
| 5yha var01        | 0.0011   | 0.00078  | 0.24  |
| 5yha var02        | 0.00087  | 0.00073  | 0.34  |
| 5yha var03        | 0.00080  | 0.00052  | 0.37  |
| 5yha var04        | 0.00066  | 0.00053  | 0.39  |
| 5yha var05        | 0.00055  | 0.00031  | 0.48  |
| 2vjj 6GVP var01   | 0.00015  | 0.00011  | 0.86  |
| 2vjj 6GVP var02   | 0.00011  | 0.00011  | 0.87  |
| 2vjj 6GVP var03   | 0.00016  | 0.00012  | 0.87  |
| 2vjj 6GVP var04   | 0.00019  | 0.00013  | 0.83  |
| 2vjj 6GVP var05   | 0.00016  | 0.00011  | 0.82  |
| 2iq1 var01        | 0.000057 | 0.000013 | 0.86  |
| 2iq1 var02        | 0.000082 | 0.000024 | 0.83  |
| 2iq1 var03        | 0.000070 | 0.000020 | 0.83  |
| 2iq1 var04        | 0.000070 | 0.000019 | 0.87  |
| 2iq1 var05        | 0.000062 | 0.000016 | 0.90  |
| 6j6c struct var01 | 0.00061  | 0.00021  | 0.43  |
| 6j6c struct var02 | 0.00058  | 0.00019  | 0.44  |
| 6j6c struct var03 | 0.00067  | 0.00027  | 0.36  |
| 6j6c struct var04 | 0.00064  | 0.00025  | 0.38  |
| 6j6c struct var05 | 0.00011  | 0.00011  | 0.84  |
| 2bbo whole var01  | 0.00048  | 0.00040  | 0.58  |
| 2bbo whole var02  | 0.00084  | 0.00060  | 0.47  |
| 2bbo whole var03  | 0.00011  | 0.00012  | 0.74  |
| 2bbo whole var04  | 0.00013  | 0.00015  | 0.67  |
| 2bbo whole var05  | 0.00029  | 0.00017  | 0.73  |
| 1sta var01        | 0.00033  | 0.000054 | 0.77  |
| 1sta var02        | 0.00033  | 0.000057 | 0.77  |
| 1sta var03        | 0.00032  | 0.000052 | 0.76  |
| 1sta var04        | 0.000059 | 0.000022 | 0.84  |
| 1sta var05        | 0.000030 | 0.000012 | 0.83  |

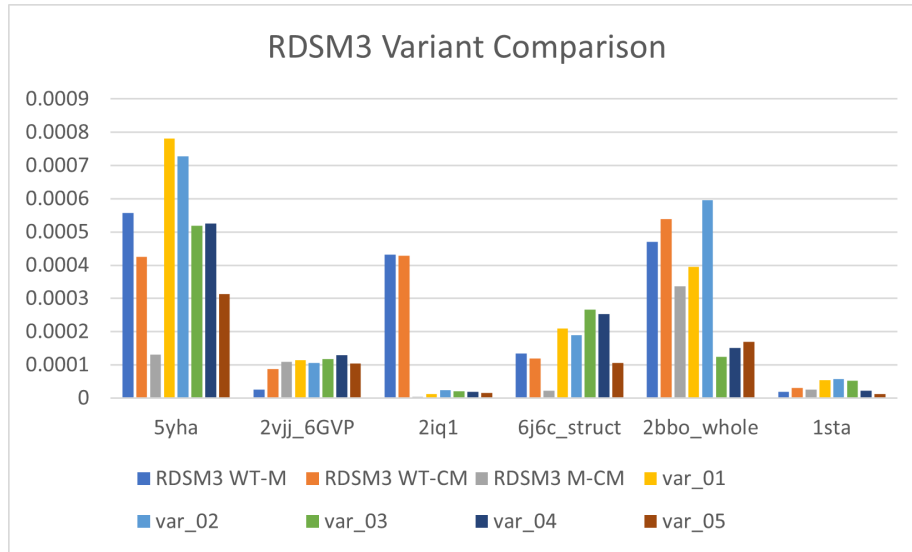

Figure S2: Comparison of the RDSM3 scores of both our original method, and 5 additional computationally generated mutants compared with our computationally generated mutant.
